# Supplementary material for: MicroRNA-142-3p Negatively Regulates Canonical Wnt Signaling Pathway
Source: PubMed Central journal article supplement (PMC4922628; doi:10.1371/journal.pone.0158432), 2016-06-27

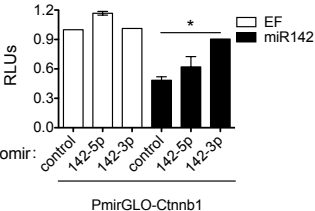

Supplement: pone.0158432.s004.pdf [file pone.0158432.s004.pdf]
